# Supplementary material for: Oxidation state variation in bis-calix[4]arene supported decametallic Mn clusters
Source: Royal Society of Chemistry journal article supplement (doi:10.1039/d1dt03410c), 2021-01-01
Supplement: d1dt03410c1.pdf [file d1dt03410c1.pdf]

SI

**Table S1.** Pertinent bond lengths (Å) and angles (°) for **3**.

| Mn1              | Mn2              | Mn3              | Mn4              | Mn5               |
|------------------|------------------|------------------|------------------|-------------------|
| Mn1-O1 1.928(6)  | Mn2-O5 1.925(5)  | Mn3-O8 2.104(4)  | Mn4-O4 2.424(7)  | Mn5-O6 2.272(4)   |
| Mn1-O2 1.910(5)  | Mn2-O6 1.912(4)  | Mn3-O11 2.11(1)  | Mn4-O5 2.114(4)  | Mn5-O7' 2.272(4)  |
| Mn1-O3 1.925(6)  | Mn2-O7 1.924(5)  | Mn3-O13 2.213(6) | Mn4-O12 2.16(1)  | Mn5-O14 1.997(5)  |
| Mn1-O4 1.943(5)  | Mn2-O8 1.934(4)  | Mn3-O15 2.199(8) | Mn4-O13 2.214(5) | Mn5-O14' 1.997(5) |
| Mn1-O13 2.139(6) | Mn2-O14 2.101(4) | Mn3-O16 2.220(6) | Mn4-O17 2.262(6) | Mn5-O16 2.320(5)  |
|                  | Mn2-N3 2.336(8)  | Mn3-O1 2.577(7)  | Mn4-O18 2.219(8) | Mn5-O17 2.290(6)  |

| Mn1                     | Mn2                      | Mn3                      | Mn4                     | Mn5                       |
|-------------------------|--------------------------|--------------------------|-------------------------|---------------------------|
| Mn1-O4-Mn4<br>98.8(2)   | Mn2-O8-Mn3<br>113.5(2)   | Mn3-O13-Mn1<br>102.3(2)  | Mn4-O5-Mn2<br>118.6(2)  | Mn5-O6-Mn2<br>97.3(2)     |
| Mn1-O13-Mn4<br>99.8(2)  | Mn2-O5-Mn4<br>118.6(2)   | Mn3-O13-Mn4<br>128.4(3)  | Mn4-O4-Mn1<br>98.8(2)   | Mn5-O7'-Mn2'<br>97.6(2)   |
| Mn1-O13-Mn3<br>102.3(2) | Mn2-O14-Mn5<br>100.6(2)  | Mn3-O8-Mn2<br>113.5(2)   | Mn4-O13-Mn1<br>99.8(2)  | Mn5-O14-Mn2<br>100.6(2)   |
| Mn1-O1-Mn3<br>96.6(2)   | Mn2-O14-Mn5'<br>101.1(2) | Mn3-O16-Mn5'<br>104.0(2) | Mn4-O13-Mn3<br>128.4(3) | Mn5-O14'-Mn2'<br>101.1(2) |
|                         | Mn2-O6-Mn5<br>97.3(2)    | Mn3-O1-Mn1<br>96.6(2)    | Mn4-O17-Mn5<br>107.5(2) | Mn5-O14-Mn5'<br>97.7(2)   |
|                         | Mn2-O7-Mn5'<br>97.6(2)   |                          |                         | Mn5-O14'-Mn5'<br>97.7(2)  |
|                         |                          |                          |                         | Mn5-O16'-Mn3'<br>104.0(2) |
|                         |                          |                          |                         | Mn5-O17-Mn3<br>107.5(2)   |

**Table S2.** Bond valence sums for Mn1 – Mn5.

| metal VBS   | d(M-L1) | d(M-L2) | d(M-L3) | d(M-L4) | d(M-L5) | r(0) | beta |
|-------------|---------|---------|---------|---------|---------|------|------|
| <b>Mn1</b>  | 2.139   | 1.943   | 1.925   | 1.91    | 1.928   | 1.76 | 0.37 |
| M(Ox.State) | 2.91083 |         |         |         |         |      |      |

| metal VBS   | d(M-L1)  | d(M-L2) | d(M-L3) | d(M-L4) | d(M-L5) | d(M-L6) | r(0) | beta |
|-------------|----------|---------|---------|---------|---------|---------|------|------|
| <b>Mn2</b>  | 2.336    | 2.101   | 1.952   | 1.934   | 1.924   | 1.912   | 1.76 | 0.37 |
| M(Ox.State) | 3.133752 |         |         |         |         |         |      |      |

| metal VBS   | d(M-L1)  | d(M-L2) | d(M-L3) | d(M-L4) | d(M-L5) | d(M-L6) | r(0) | beta |
|-------------|----------|---------|---------|---------|---------|---------|------|------|
| <b>Mn3</b>  | 2.104    | 2.199   | 2.213   | 2.22    | 2.114   | 2.557   | 1.79 | 0.37 |
| M(Ox.State) | 1.933054 |         |         |         |         |         |      |      |

| metal VBS   | d(M-L1)  | d(M-L2) | d(M-L3) | d(M-L4) | d(M-L5) | d(M-L6) | r(0) | beta |
|-------------|----------|---------|---------|---------|---------|---------|------|------|
| <b>Mn4</b>  | 2.424    | 2.262   | 2.114   | 2.219   | 2.214   | 2.155   | 1.79 | 0.37 |
| M(Ox.State) | 1.880517 |         |         |         |         |         |      |      |

| metal VBS   | d(M-L1)  | d(M-L2) | d(M-L3) | d(M-L4) | d(M-L5) | d(M-L6) | r(0) | beta |
|-------------|----------|---------|---------|---------|---------|---------|------|------|
| <b>Mn5</b>  | 2.272    | 2.272   | 2.29    | 1.992   | 1.997   | 2.32    | 1.79 | 0.37 |
| M(Ox.State) | 2.192022 |         |         |         |         |         |      |      |

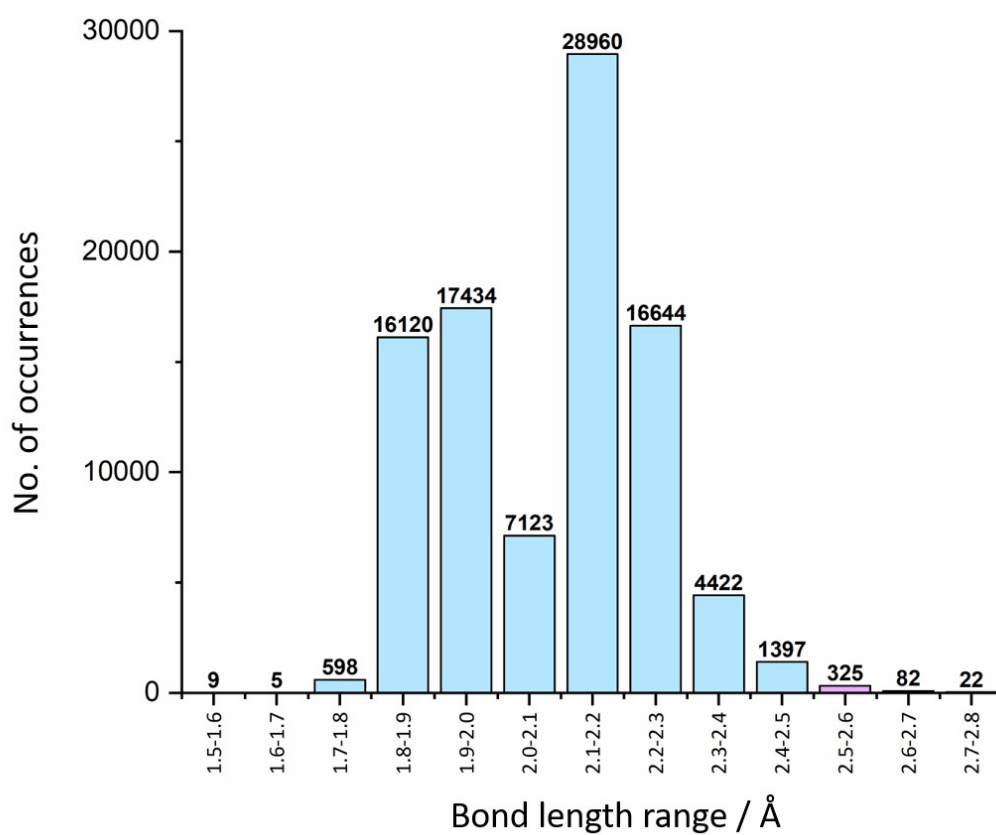

**Figure S1.** A histogram showing the variation in Mn-O bond lengths in the CSD. The purple bar denotes the range where the Mn3...O1 distance in complex **3** lies.

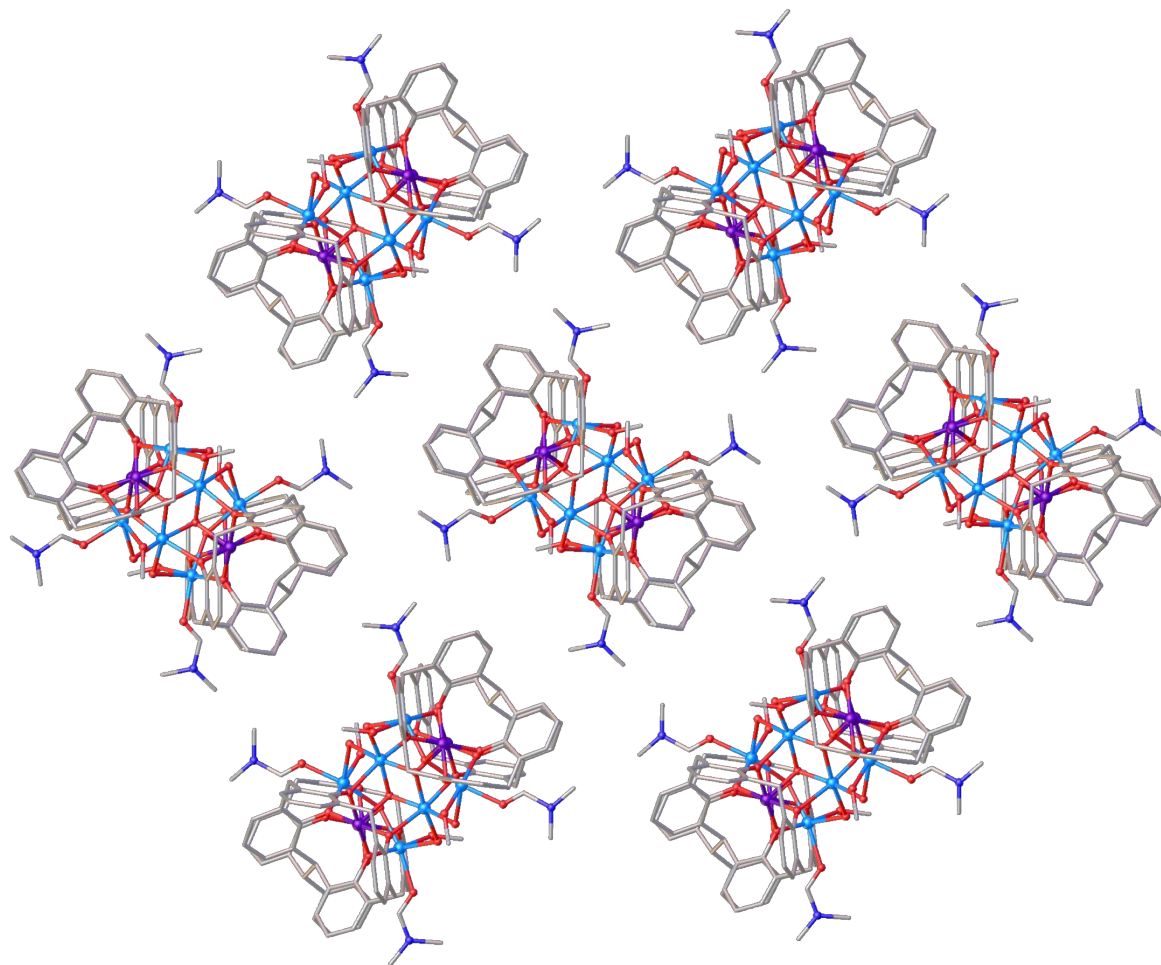

**Figure S2.** Extended structure of **3** shown along the *a*-axis. The *t*Bu groups of the L ligands, H-atoms, co-crystallised and some ligated solvent are omitted for clarity. Colour code C – grey, O – red, N – dark blue, Mn<sup>II</sup> – pale blue, Mn<sup>III</sup> – purple.

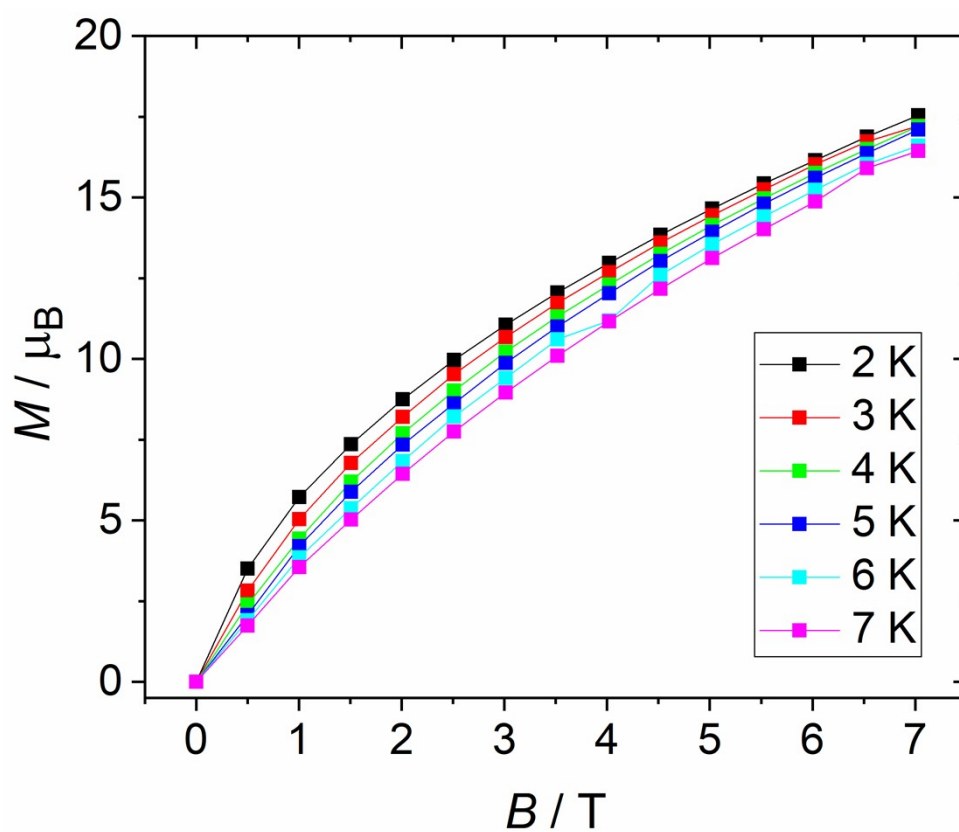

**Figure S3.** Variable-temperature-variable-field (VTVB) magnetisation data of **3** at  $T = 2-7$  K and  $B = 0-7$  T.

### Computational details

DFT calculations were performed on the full crystal structures of complexes **3** and **4**. The energies of each spin configuration were computed using a hybrid UB3LYP functional with the TZV basis set<sup>1</sup> as implemented in Gaussian 16 software. The exchange interactions were estimated using the broken symmetry approach,<sup>2</sup> which has been shown to yield good numerical estimates of  $J$  values in polymetallic systems<sup>3</sup> based on the extended pair-wise interaction model, proposed by Ruiz and co-workers.<sup>4</sup> This methodology has been proven to yield very good numerical estimates of exchange interactions for Mn clusters possessing weak ferro/antiferromagnetic coupling.<sup>5</sup> Indeed, there are instances where these calculations were employed to detect errors in experimental susceptibility data due to sample decay.<sup>6</sup> The chosen spin configurations for our calculations are given in Figures S6-S8, along with their corresponding computed spin density plots. The spin-Hamiltonian below was used to estimate the exchange interactions. We have also estimated these using Yamaguchi's spin-projection formula<sup>7</sup> for the model complex, which yielded very similar results (Figure S5).

$$E_{\text{HS}} = -J_1[\hat{S}_1 \cdot \hat{S}_2] - J_2[\hat{S}_1 \cdot \hat{S}_3 + \hat{S}_1 \cdot \hat{S}_4 + \hat{S}_2 \cdot \hat{S}_5 + \hat{S}_2 \cdot \hat{S}_6] - J_3[\hat{S}_3 \cdot \hat{S}_5 + \hat{S}_4 \cdot \hat{S}_6] - J_4[\hat{S}_3 \cdot \hat{S}_9 + \hat{S}_5 \cdot \hat{S}_9 + \hat{S}_4 \cdot \hat{S}_{10} + \hat{S}_6 \cdot \hat{S}_{10}] - J_5[\hat{S}_1 \cdot \hat{S}_7 + \hat{S}_1 \cdot \hat{S}_8 + \hat{S}_2 \cdot \hat{S}_7 + \hat{S}_2 \cdot \hat{S}_8] - J_6[\hat{S}_3 \cdot \hat{S}_7 + \hat{S}_4 \cdot \hat{S}_8 + \hat{S}_5 \cdot \hat{S}_7 + \hat{S}_6 \cdot \hat{S}_8]$$

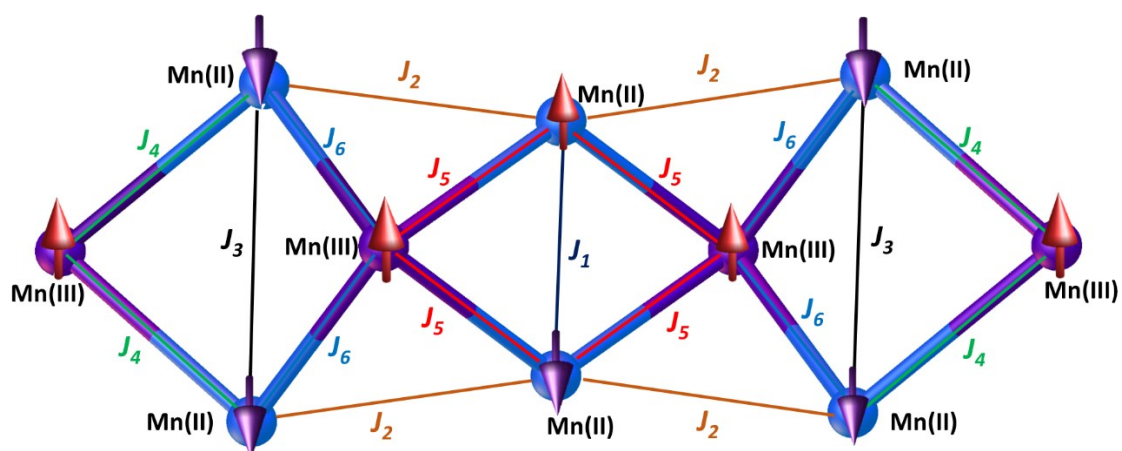

**Figure S4.** Depiction of the ground state of the complex **3** based on the DFT calculated exchange coupling constants,  $J_{1-6}$ .

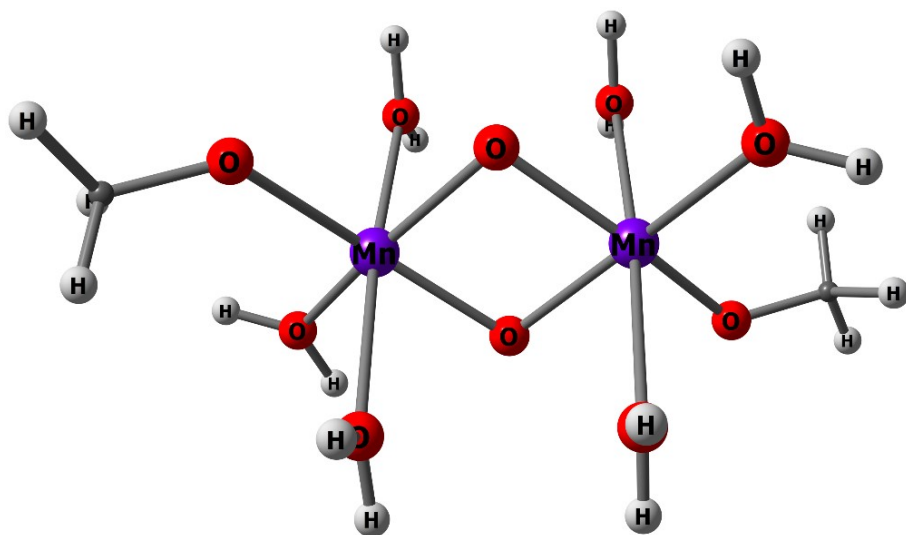

**Figure S5.** Dimeric model complex taken from the X-ray structure employed to verify the magnitude of  $J_1$  in complex **4**. The exchange interaction obtained in dimeric model is  $J = -92 \text{ cm}^{-1}$ . We have verified the  $J$  value using the Yamaguchi model, which computes  $J = -115 \text{ cm}^{-1}$ .

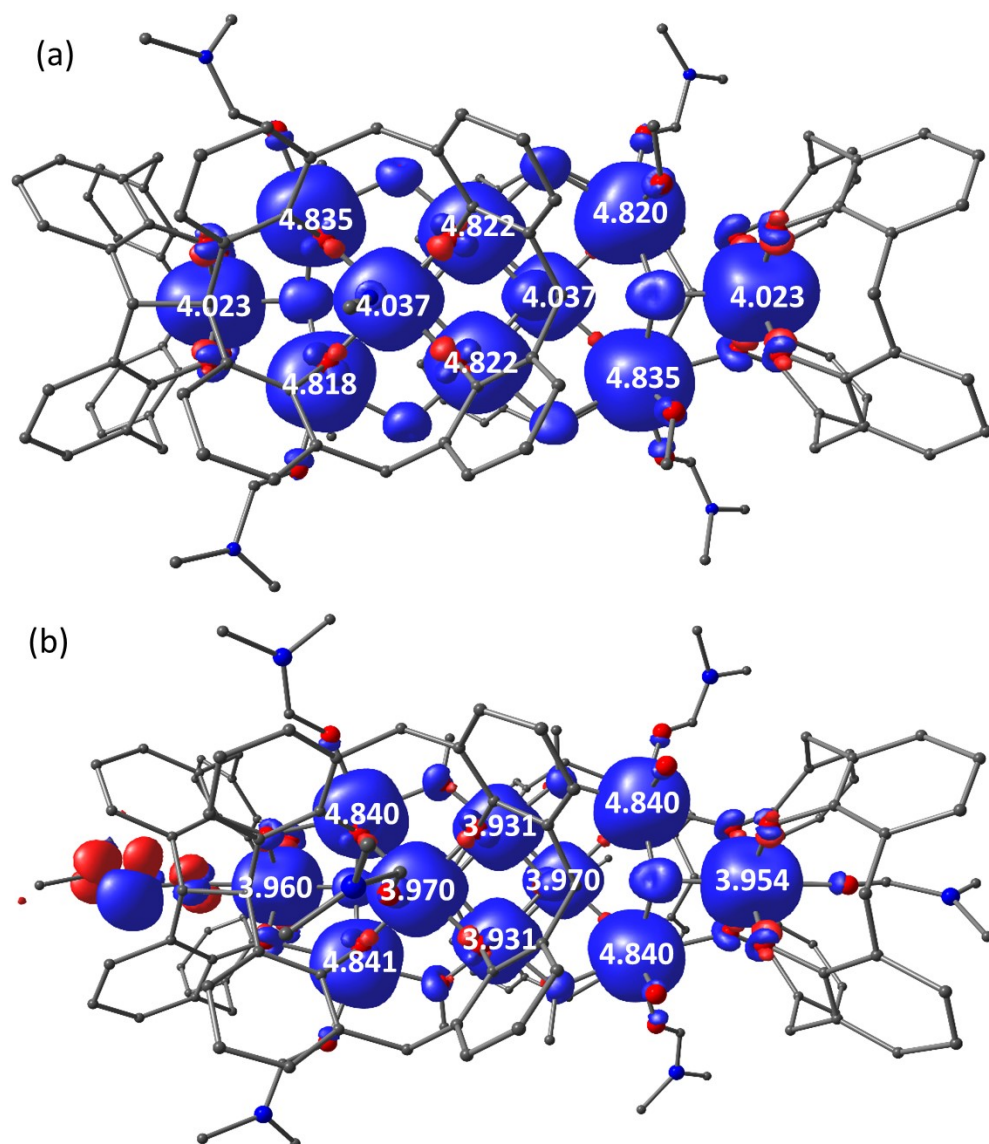

**Figure S6.** Computed spin densities for the high spin state of **3** (a) and **4** (b) with a cut-off value of 0.0006 a.u. The blue colour represents positive spin density and the red colour negative spin density.

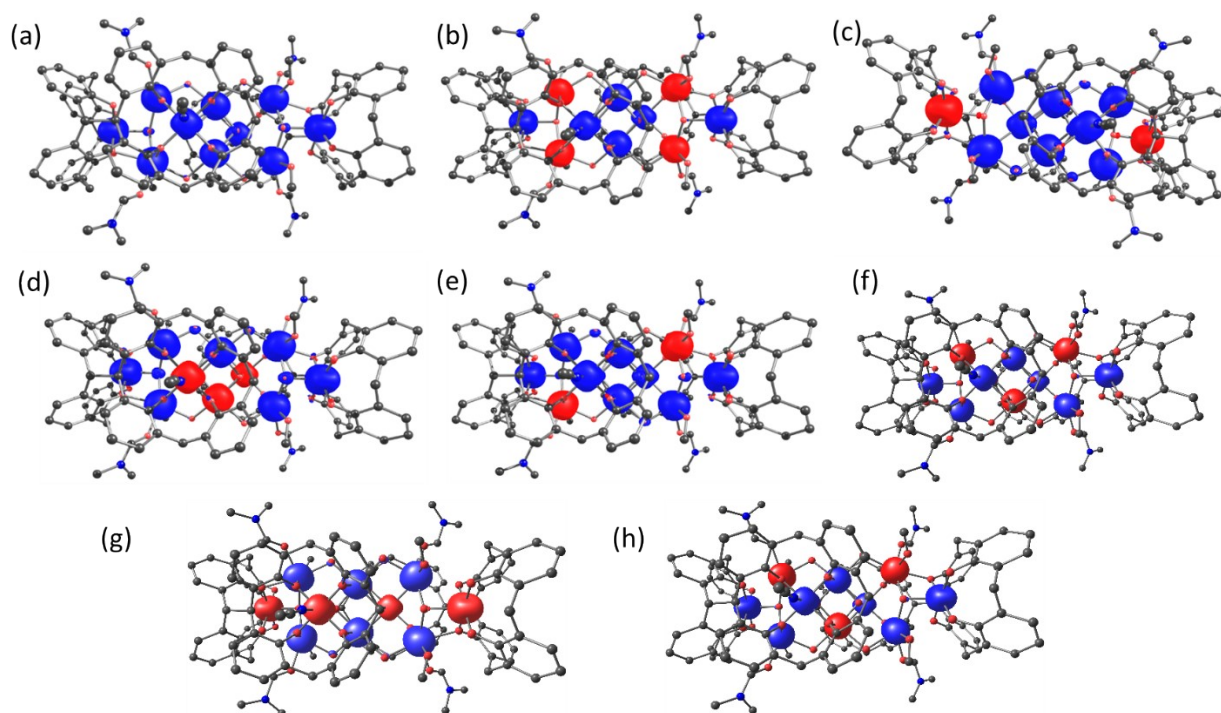

**Figure S7.** Computed spin density plot for all broken symmetries of complex **3** with a cut-off value of 0.0006 a.u. The blue colour represents positive spin density and the red colour negative spin density.

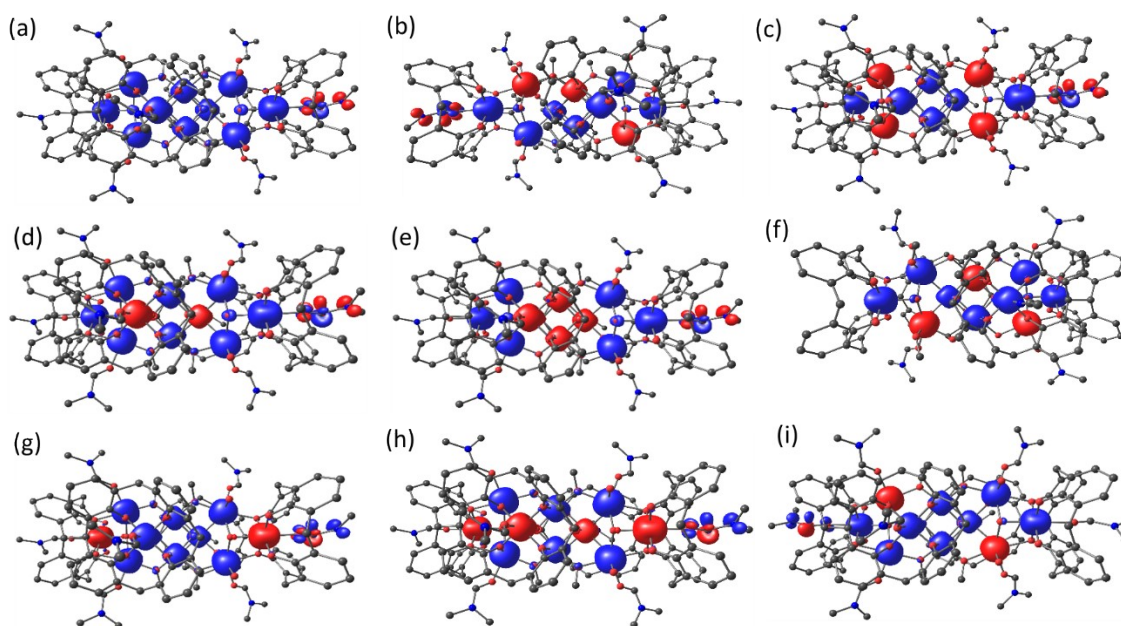

**Figure S8.** Computed spin density plot for all broken symmetries of complex **4** with a cut-off value of 0.0006 a.u. The blue colour represents positive spin density and the red colour negative spin density.

## References

1. A. Schäfer, H. Horn and R. Ahlrichs, *J. Chem. Phys.*, 1992, **97**, 2571; (b) A. Schäfer, C. Huber and R. Ahlrichs, *J. Chem. Phys.*, 1994, **100**, 5829.
2. L. Noodleman, *J. Chem. Phys.*, 1981, **74**, 5737– 5743.
3. G. Rajaraman, J. Cano, E. K. Brechin and E. J. L. McInnes, *Chem. Commun.*, 2004, 1476–1477; P. Christian, G. Rajaraman, A. Harrison, J. J. W. McDouall, R. E. P. Winpenny, *Dalton Trans.*, 2004, 1511–1512; K. R. Vignesh, S. K. Langley, K. S. Murray and G. Rajaraman, *Chem. Eur. J.*, 2015, **21**, 2881–2892; P. Christian, G. Rajaraman, A. Harrison, M. Helliwell, J. J. W. McDouall, J. Raftery and R. E. P. Winpenny, *Dalton Trans.*, 2004, 2550–2555.
4. E. Ruiz, A. Rodríguez-Fortea, J. Cano, S. Alvarez and P. Alemany, *J. Comput. Chem.*, 2003, **24**, 982-989.
5. a) W. P. Barros, R. Inglis, G. S. Nichol, T. Rajeshkumar, G. Rajaraman, S. Piligkos, H. O. Stumpf and E. K. Brechin, *Dalton Trans.*, 2013, **42**, 16510-16517; b) K. R. Vignesh, S. K. Langley, C. J. Gartshore, I. Borilović, C. M. Forsyth, G. Rajaraman and K. S. Murray, *Dalton Trans.*, 2018, **47**, 11820–11833; c) K. R. Vignesh, S. K. Langley, C. J. Gartshore, B. Moubaraki, K. S. Murray and G. Rajaraman, *Inorg. Chem.*, 2017, **56**, 1932-1949; d) E. Cremades, J. Cano, E. Ruiz, G. Rajaraman, C. J. Milios and E. K. Brechin., *Inorg. Chem.*, 2009, **48**, 8012-8019; e) C. J. Milios, M. Manoli, G. Rajaraman, A. Mishra, L. E. Budd, F. White, S. Parsons, W. Wernsdorfer, G. Christou and E. K. Brechin., *Inorg. Chem.*, 2006, **45**, 6782-6793.
6. K. R. Vignesh, S. K. Langley, K. S. Murray and G. Rajaraman., *Chem. Eur. J.*, 2015, **21**, 2881-2892.
7. T. Onishi, Y. Takano, Y. Kitagawa, T. Kawakami, Y. Yoshioka and K. Yamaguchi, *Polyhedron*, 2001, **20**, 1177.
